# Supplementary material for: Switching Power Universality in Unipolar Resistive Switching Memories
Source: PubMed Central journal article supplement (PMC4817028; doi:10.1038/srep23930), 2016-04-01
Supplement: srep23930-s1.pdf [file srep23930-s1.pdf]

# Supporting Information

## SWITCHING POWER UNIVERSALITY IN UNIPOLAR RESISTIVE SWITCHING MEMORIES

Jongmin Kim<sup>1</sup>, Kyoocho Jung<sup>1,2</sup>, Yongmin Kim<sup>1,3</sup>, Yongcheol Jo<sup>1</sup>, Sangeun Cho<sup>1</sup>, Hyeonseok Woo<sup>1</sup>, Seongwoo Lee<sup>1</sup>, A. I. Inamdar<sup>1</sup>, Jinpyo Hong<sup>4</sup>, Jeon-Kook Lee<sup>5</sup>, Hyungsang Kim<sup>1</sup>, Hyunsik Im<sup>1</sup>

<sup>1</sup>Division of Physics and Semiconductor Science, Dongguk University, Seoul 100-715, Republic of Korea. <sup>2</sup>R&D Division, Flash Integration Technology Team, SK-Hynix, 2091 Gyeongchung daero Bubal-eub, Icheon-si Gyeonggi-do, Republic of Korea. <sup>3</sup>LED Product & Technology, LED Business, Samsung Electronics Co., Ltd, San #24 Nongseo-dong, Giheung-gu, Yongin-city, Gyeonggi-do, 446-711, Republic of Korea. <sup>4</sup>Department of Physics, Hanyang University, Seoul 133-791, Republic of Korea. <sup>5</sup>Center for Opto-Electronic Materials and Devices, Korea Institute Science & Technology (KIST), Seoul 136-791, Republic of Korea.

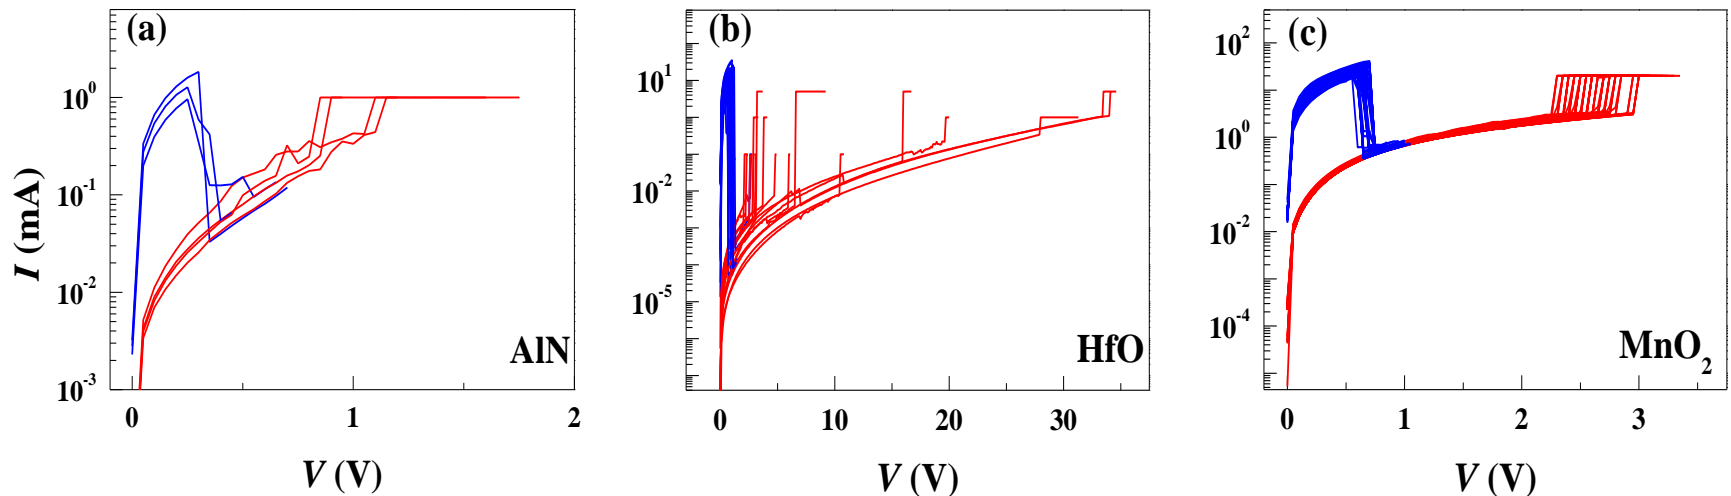

**Fig. S1.** Representative resistive switching current-voltage curves for (a) Ti/AlN/Ti, (b) Pt/HfO/Ti and (c) Ti/MnO<sub>2</sub>/Pt devices.

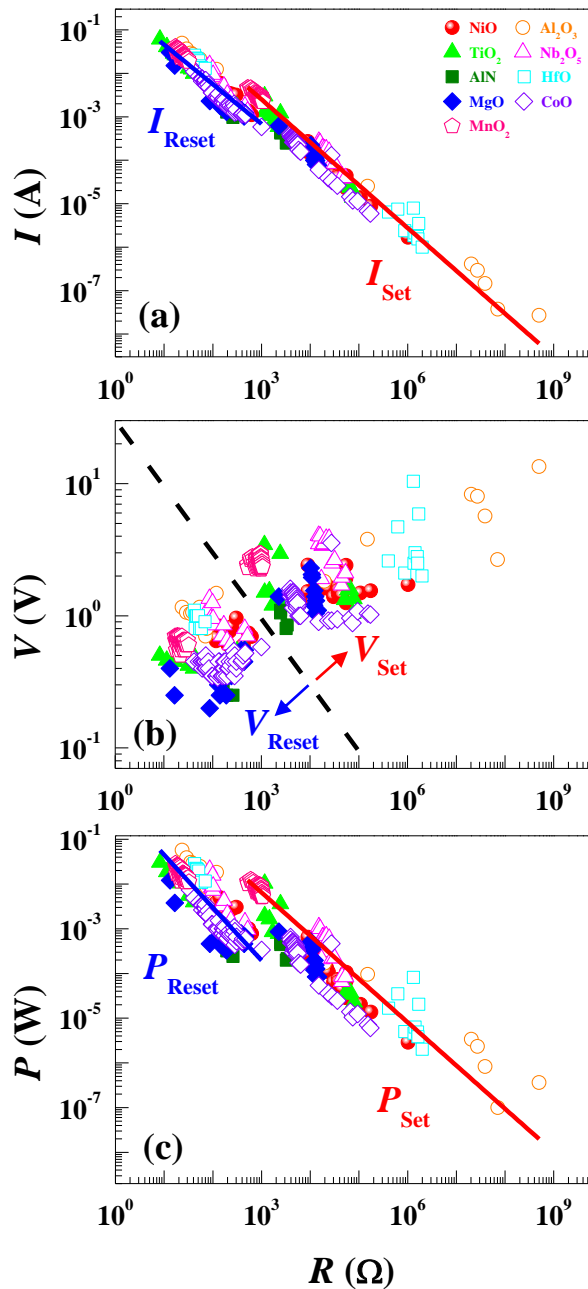

**Fig. S2.** (a) Switching current  $I$ , (b) switching voltage  $V$  and (c) switching power  $P$  as a function of switching resistance  $R$  for the Set and Reset processes. The solid lines represent the least-squares fitting curves using a  $R^{-\beta}$  power-law.

| Material                       | $\beta_{\text{Set}}$ | $\beta_{\text{Reset}}$ |
|--------------------------------|----------------------|------------------------|
| NiO                            | $0.92 \pm 0.219$     | $0.93 \pm 0.232$       |
| Al <sub>2</sub> O <sub>3</sub> | $0.68 \pm 0.429$     | $1.49 \pm 0.193$       |
| TiO <sub>2</sub>               | $1.20 \pm 0.133$     | $1.16 \pm 0.128$       |
| Nb <sub>2</sub> O <sub>5</sub> | $2.03 \pm 0.552$     | $1.55 \pm 0.509$       |
| HfO                            | $0.93 \pm 0.878$     | $1.76 \pm 0.618$       |
| MgO                            | $1.10 \pm 0.224$     | $1.10 \pm 0.849$       |
| CoO                            | $1.17 \pm 0.251$     | $1.05 \pm 0.074$       |
| MnO <sub>2</sub>               | $0.98 \pm 0.076$     | $1.35 \pm 0.079$       |
| Average                        | $1.15 \pm 0.363$     | $1.35 \pm 0.350$       |

**Table. S1.** Extracted exponent  $\beta$  values for individual RS devices. RS devices with a large number of switching cycles are used. The average value of the individually obtained  $\beta$  parameters is comparable to the  $\beta$  value obtained from the full least-squares fitting, validating the power-law relation between switching power and switching resistance.

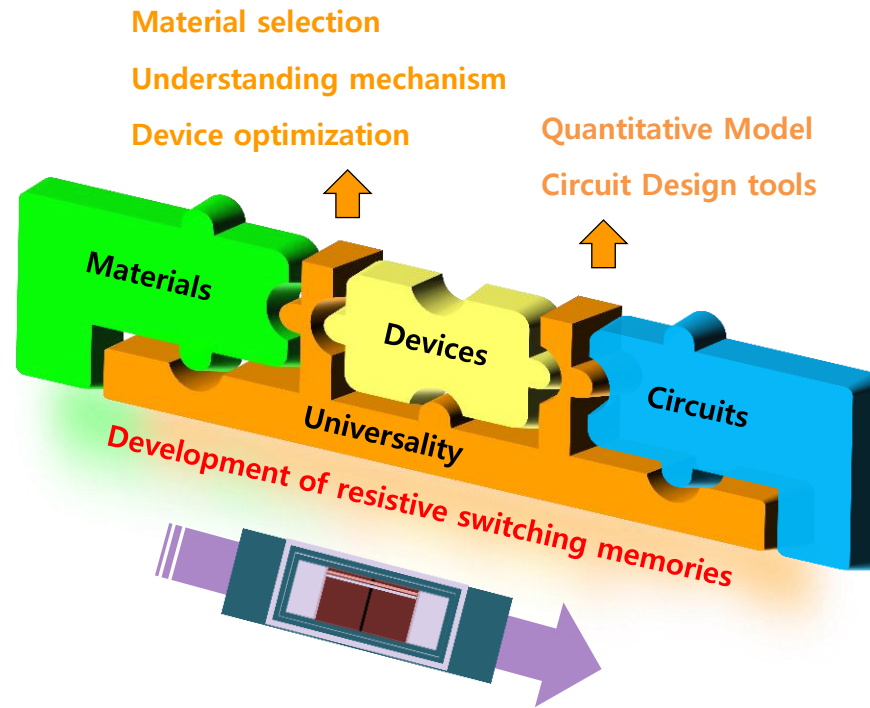

**Fig. S3. Importance of quantitative universality for the development of resistive switching memories.**

The quantitative universality of device parameters in various resistive switching devices can provide a deeper understanding of the correlation between materials, devices and circuits, regardless of different process integration schemes used in the ReRAM industry.
